# Supplementary material for: Evolution of the Reaction and Alteration of Mudstone with Ordinary Portland Cement Leachates: Sequential Flow Experiments and Reactive-Transport Modelling
Source: MDPI journal article supplement (doi:10.3390/min11091026), 2021-09-21
Supplement: s1 [file s1]

## Article

# Evolution of the Reaction and Alteration of Mudstone with Ordinary Portland Cement Leachates: Sequential Flow Experiments and Reactive-Transport Modelling

Keith Bateman <sup>1,\*</sup>, Shota Murayama <sup>1</sup>, Yuji Hanamachi <sup>2</sup>, James Wilson <sup>3</sup>, Takamasa Seta <sup>2</sup>, Yuki Amano <sup>1</sup>, Mitsuru Kubota <sup>1</sup>, Yuji Ohuchi <sup>1</sup>, and Yukio Tachi <sup>1</sup>

<sup>1</sup> Nuclear Fuel Cycle Engineering Laboratories, Japan Atomic Energy Agency, Tokai, Ibaraki 319-1194, Japan; murayama.shota@jaea.go.jp (S.M.); amano.yuki@jaea.go.jp (Y.A.); kubota.mitsuru@jaea.go.jp (M.K.); ohuchi.yuji@jaea.go.jp (Y.O.); tachi.yukio@jaea.go.jp (Y.T.)

<sup>2</sup> QJ Science, 8-1 Sakaecho, Yokohama, Kanagawa, 221-0052, Japan; hanamachi.yuji@jaea.go.jp (Y.H.); takamasa.seta@qjscience.co.jp (T.S.)

<sup>3</sup> Wilson Scientific Ltd., Birchwood, Warrington WA3 6TR, UK; jim@wilsonscientific.co.uk

\* Correspondence: bateman.keith@jaea.go.jp

## Supplementary Materials

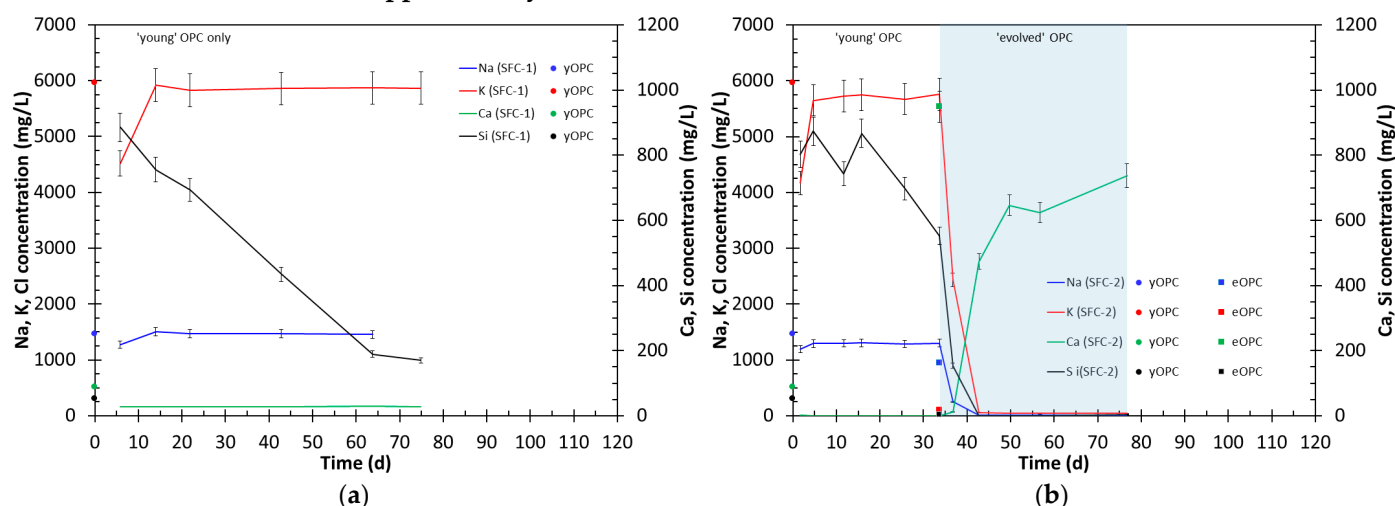

**Figure S1.** Major changes in fluid chemistry with time. (a) Horonobe mudstone with 'young' OPC leachate (SFC-1); (b) Horonobe mudstone with 'young' OPC, then 'evolved' OPC leachate (SFC-2). Legend text: yOPC – 'young' OPC leachate; eOPC – 'evolved' OPC leachate; HGW – Horonobe Groundwater. Lines indicate concentrations in reacted samples; Single points the original concentration in the reacting fluids. X-axis at same scale as Figure 4 for direct comparison of data.

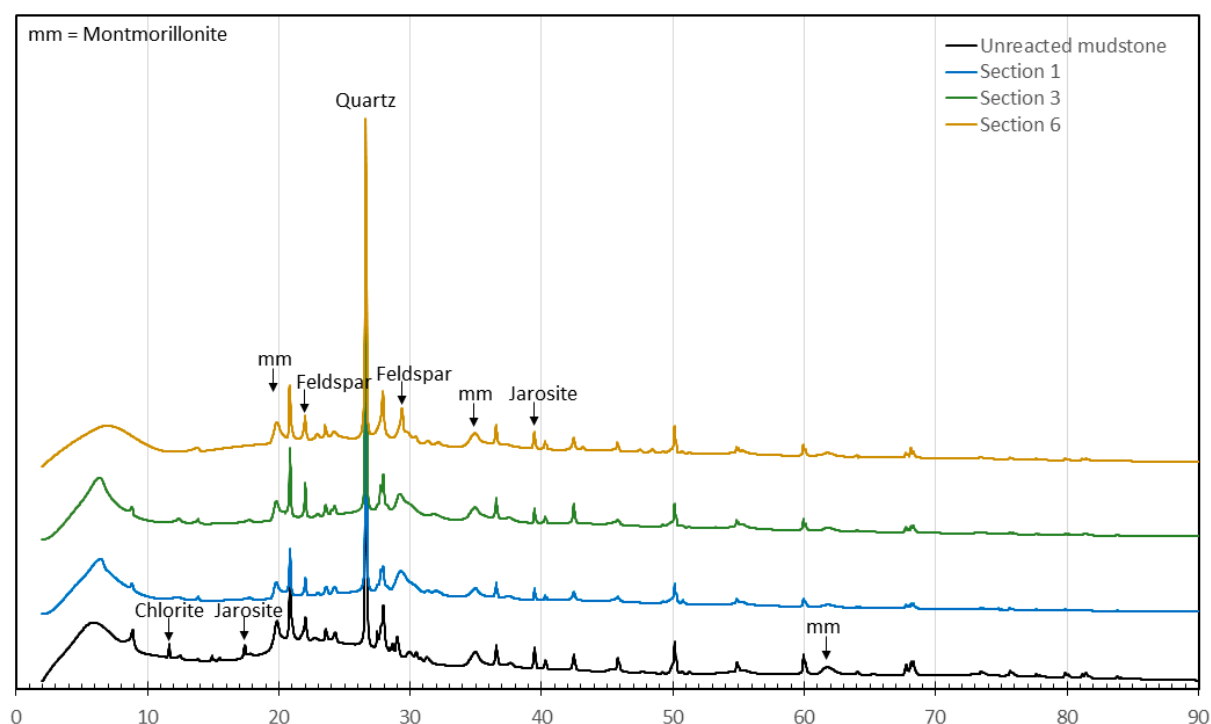

**Figure S2.** XRD analysis of unreacted and reacted mudstone samples experiment with 'young' OPC, then the 'evolved' OPC leachate (SFC-2), Sections 1,2 and 6. Showing little difference between unreacted and reacted solids.

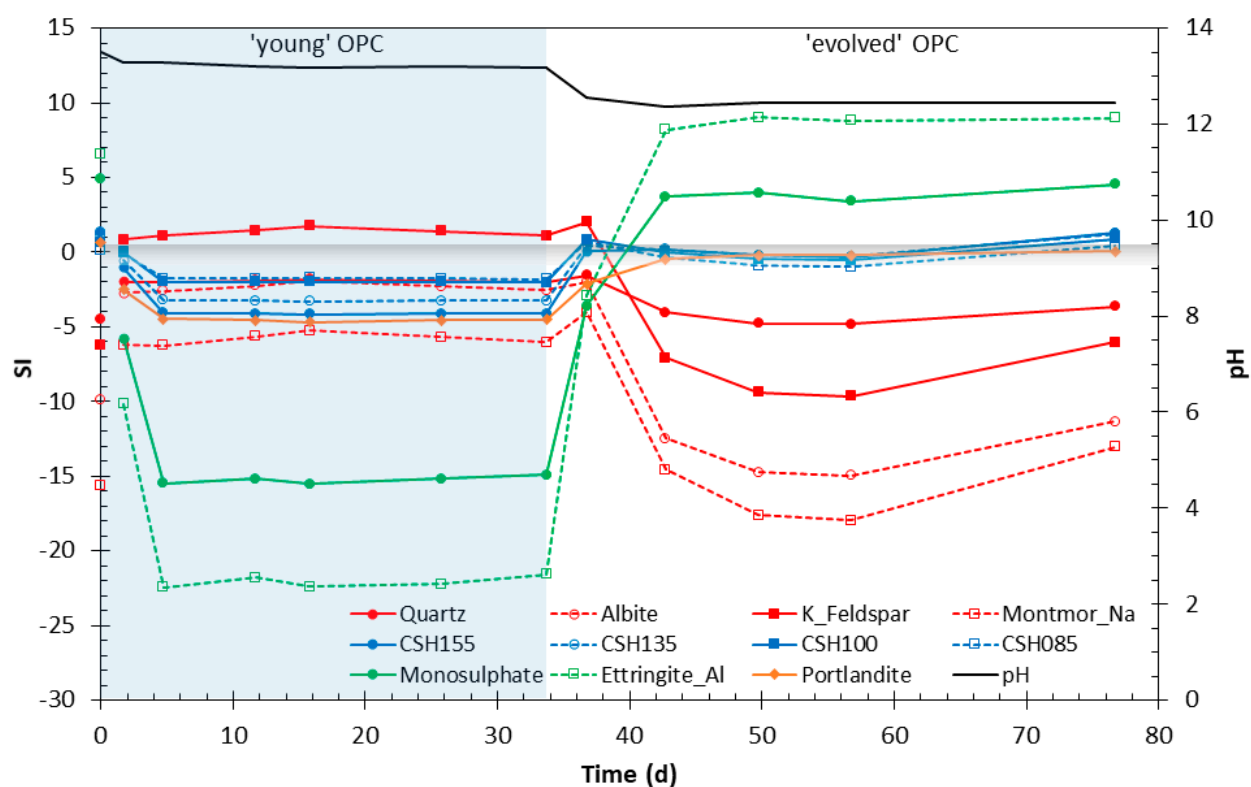

**Figure S3.** Selected primary mineral and C-S-H phase saturation states in reacted fluids, experiment with 'young' OPC, then the 'evolved' OPC leachate (SFC-2).

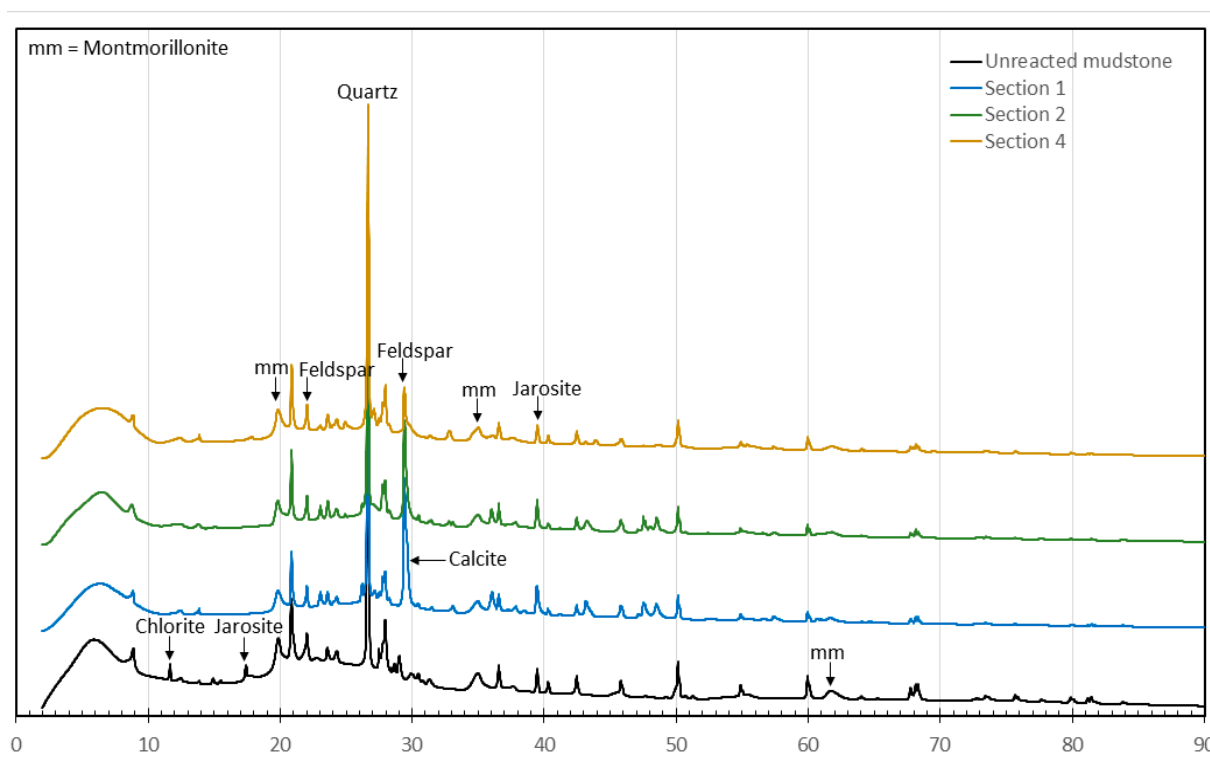

**Figure S4.** XRD analysis of unreacted and reacted mudstone samples experiment with ‘young’ OPC, then the ‘evolved’ OPC leachate followed by HGW (SFC-3), Sections 1,2 and 6. Showing little difference between unreacted and reacted solids apart from presence of calcite (Sections 1,2).

#### CABARET model parameters.

In order to create the reacting fluids in situ within the CABARET model three hypothetical mineral assemblages were defined. These were then reacted at appropriate timesteps (0, ~40, and ~80 days) with ‘pure’ water to produce fluids with aqueous chemistry matching that of the OPC leachates and the Horonobe Groundwater.

**Table S1.** Calculated Log  $K_{(297.15K)}$  for the hypothetical minerals; ‘young’ OPC leachate.

| Mineral name         | Formula                 | Dissolution reaction                                                                             | Calculated Log K |
|----------------------|-------------------------|--------------------------------------------------------------------------------------------------|------------------|
| A_YoungOPC_calcium   | $\text{Ca(OH)}_2$       | $[\text{Ca(OH)}_2] + 2[\text{H}^+] \rightleftharpoons [\text{Ca}^{++}] + 2[\text{H}_2\text{O}]$  | 22.8             |
| A_YoungOPC_chlorine  | HCl                     | $[\text{HCl}] \rightleftharpoons [\text{H}^+] + [\text{Cl}^-]$                                   | -33.4            |
| A_YoungOPC_aluminium | $\text{Al(OH)}_3$       | $[\text{Al(OH)}_3] + [\text{H}_2\text{O}] \rightleftharpoons [\text{Al(OH)}_4^-] + [\text{H}^+]$ | -10.4            |
| A_YoungOPC_carbon    | $\text{H}_2\text{CO}_3$ | $[\text{H}_2\text{CO}_3] \rightleftharpoons 2[\text{H}^+] + [\text{CO}_3^{--}]$                  | -36.9            |
| A_YoungOPC_potassium | KOH                     | $[\text{KOH}] + [\text{H}^+] \rightleftharpoons [\text{K}^+] + [\text{H}_2\text{O}]$             | 12.4             |
| A_YoungOPC_magnesium | $\text{Mg(OH)}_2$       | $[\text{Mg(OH)}_2] + 2[\text{H}^+] \rightleftharpoons [\text{Mg}^{++}] + 2[\text{H}_2\text{O}]$  | 4.86             |
| A_YoungOPC_sodium    | NaOH                    | $[\text{NaOH}] + [\text{H}^+] \rightleftharpoons [\text{Na}^+] + [\text{H}_2\text{O}]$           | 11.9             |
| A_YoungOPC_silicon   | $\text{Si(OH)}_4$       | $[\text{Si(OH)}_4] \rightleftharpoons [\text{Si(OH)}_4(\text{aq})]$                              | -24.3            |
| A_YoungOPC_water     | $\text{H}_2\text{O}$    | $[\text{H}_2\text{O}] \rightleftharpoons [\text{H}_2\text{O}]$                                   | -0.002           |
| A_YoungOPC_sulfur    | $\text{H}_2\text{SO}_4$ | $[\text{H}_2\text{SO}_4] \rightleftharpoons 2[\text{H}^+] + [\text{HSO}_4^-]$                    | -47.3            |

**Table 2.** Calculated Log  $K_{(297.15K)}$  for the hypothetical minerals; ‘evolved’ OPC leachate.

| Mineral name       | Formula                 | Dissolution reaction                                                                             | Calculated Log K |
|--------------------|-------------------------|--------------------------------------------------------------------------------------------------|------------------|
| A_OldOPC_calcium   | $\text{Ca(OH)}_2$       | $[\text{Ca(OH)}_2] + 2[\text{H}^+] \rightleftharpoons [\text{Ca}^{++}] + 2[\text{H}_2\text{O}]$  | 22.93            |
| A_OldOPC_chlorine  | HCl                     | $[\text{HCl}] \rightleftharpoons [\text{H}^+] + [\text{Cl}^-]$                                   | -32.69           |
| A_OldOPC_aluminium | $\text{Al(OH)}_3$       | $[\text{Al(OH)}_3] + [\text{H}_2\text{O}] \rightleftharpoons [\text{Al(OH)}_4^-] + [\text{H}^+]$ | -9.735           |
| A_OldOPC_carbon    | $\text{H}_2\text{CO}_3$ | $[\text{H}_2\text{CO}_3] \rightleftharpoons 2[\text{H}^+] + [\text{CO}_3^{--}]$                  | -35.90           |

|                    |                          |                                                                                                        |          |
|--------------------|--------------------------|--------------------------------------------------------------------------------------------------------|----------|
| A_OldOPC_potassium | KOH                      | $[\text{KOH}] + [\text{H}^+] \rightleftharpoons [\text{K}^+] + [\text{H}_2\text{O}]$                   | −7.604   |
| A_OldOPC_magnesium | $\text{Mg}(\text{OH})_2$ | $[\text{Mg}(\text{OH})_2] + 2[\text{H}^+] \rightleftharpoons [\text{Mg}^{++}] + 2[\text{H}_2\text{O}]$ | 4.054    |
| A_OldOPC_sodium    | NaOH                     | $[\text{NaOH}] + [\text{H}^+] \rightleftharpoons [\text{Na}^+] + [\text{H}_2\text{O}]$                 | −7.596   |
| A_OldOPC_silicon   | $\text{Si}(\text{OH})_4$ | $[\text{Si}(\text{OH})_4] \rightleftharpoons [\text{Si}(\text{OH})_{4(\text{aq})}]$                    | −23.65   |
| A_OldOPC_water     | $\text{H}_2\text{O}$     | $[\text{H}_2\text{O}] \rightleftharpoons [\text{H}_2\text{O}]$                                         | −0.00068 |
| A_OldOPC_sulfuer   | $\text{H}_2\text{SO}_4$  | $[\text{H}_2\text{SO}_4] \rightleftharpoons 2[\text{H}^+] + [\text{HSO}_4^-]$                          | −45.58   |

**Table S3.** Calculated Log  $K_{(297.15\text{K})}$  for the hypothetical minerals; Horonobe groundwater.

| Mineral name        | Formula                  | Dissolution reaction                                                                                            | Calculated Log K |
|---------------------|--------------------------|-----------------------------------------------------------------------------------------------------------------|------------------|
| A_HoroOPC_calcium   | $\text{Ca}(\text{OH})_2$ | $[\text{Ca}(\text{OH})_2] + 2[\text{H}^+] \rightleftharpoons [\text{Ca}^{++}] + 2[\text{H}_2\text{O}]$          | 13.7             |
| A_HoroOPC_chlorine  | HCl                      | $[\text{HCl}] \rightleftharpoons [\text{H}^+] + [\text{Cl}^-]$                                                  | −9.69            |
| A_HoroOPC_aluminium | $\text{Al}(\text{OH})_3$ | $[\text{Al}(\text{OH})_3] + [\text{H}_2\text{O}] \rightleftharpoons [\text{Al}(\text{OH})_{4-}] + [\text{H}^+]$ | 9.52             |
| A_HoroOPC_carbon    | $\text{H}_2\text{CO}_3$  | $[\text{H}_2\text{CO}_3] \rightleftharpoons 2[\text{H}^+] + [\text{CO}_3^{--}]$                                 | −10.2            |
| A_HoroOPC_potassium | KOH                      | $[\text{KOH}] + [\text{H}^+] \rightleftharpoons [\text{K}^+] + [\text{H}_2\text{O}]$                            | 5.67             |
| A_HoroOPC_magnesium | $\text{Mg}(\text{OH})_2$ | $[\text{Mg}(\text{OH})_2] + 2[\text{H}^+] \rightleftharpoons [\text{Mg}^{++}] + 2[\text{H}_2\text{O}]$          | 14.1             |
| A_HoroOPC_sodium    | NaOH                     | $[\text{NaOH}] + [\text{H}^+] \rightleftharpoons [\text{Na}^+] + [\text{H}_2\text{O}]$                          | 7.44             |
| A_HoroOPC_silicon   | $\text{Si}(\text{OH})_4$ | $[\text{Si}(\text{OH})_4] \rightleftharpoons [\text{Si}(\text{OH})_{4(\text{aq})}]$                             | −3.04            |
| A_HoroOPC_water     | $\text{H}_2\text{O}$     | $[\text{H}_2\text{O}] \rightleftharpoons [\text{H}_2\text{O}]$                                                  | −0.003           |
| A_HoroOPC_sulfuer   | $\text{H}_2\text{SO}_4$  | $[\text{H}_2\text{SO}_4] \rightleftharpoons 2[\text{H}^+] + [\text{HSO}_4^-]$                                   | −37.7            |

**Table S4.** Details of the dissolved chemical species included in the CABARET reactive transport model.

| Aqueous Basis species                 | Aqueous Complex species                    |                                            |                                          |
|---------------------------------------|--------------------------------------------|--------------------------------------------|------------------------------------------|
| $\text{H}_2\text{O}$                  | $\text{Al}(\text{OH})_2^+$                 | $\text{CO}_3^{--}$                         | $\text{MgSiO}(\text{OH})_3^+$            |
|                                       | $\text{Al}(\text{OH})_{3(\text{aq})}$      | $\text{KCl}(\text{aq})$                    | $\text{NaAl}(\text{OH})_{4(\text{aq})}$  |
| $\text{Al}^{+++}$                     | $\text{Al}(\text{OH})_4^-$                 | $\text{KCO}_3^-$                           | $\text{NaCl}(\text{aq})$                 |
| $\text{Ca}^{++}$                      | $\text{CaAl}(\text{OH})_4^+$               | $\text{KHCO}_3(\text{aq})$                 | $\text{NaCO}_3^-$                        |
| $\text{Cl}^-$                         | $\text{CaCl}^+$                            | $\text{KOH}(\text{aq})$                    | $\text{NaHCO}_{3(\text{aq})}$            |
| $\text{H}^+$                          | $\text{CaCl}_{2(\text{aq})}$               | $\text{KSiO}_2(\text{OH})_2^-$             | $\text{NaOH}(\text{aq})$                 |
| $\text{HCO}_3^-$                      | $\text{CaCO}_{3(\text{aq})}$               | $\text{KSiO}(\text{OH})_{3(\text{aq})}$    | $\text{NaSiO}_2(\text{OH})_2^-$          |
| $\text{K}^+$                          | $\text{CaHCO}_3^+$                         | $\text{MgAl}(\text{OH})_4^-$               | $\text{NaSiO}(\text{OH})_{3(\text{aq})}$ |
| $\text{Mg}^{++}$                      | $\text{CaOH}^+$                            | $\text{MgCO}_{3(\text{aq})}$               | $\text{OH}^-$                            |
| $\text{Na}^+$                         | $\text{CaSiO}_2(\text{OH})_{2(\text{aq})}$ | $\text{MgHCO}_3^+$                         | $\text{SiO}(\text{OH})_3^-$              |
| $\text{Si}(\text{OH})_{4(\text{aq})}$ | $\text{CaSiO}(\text{OH})_3^+$              | $\text{MgOH}^+$                            | $\text{SiO}_2(\text{OH})_2^{--}$         |
| $\text{SO}_4^{--}$                    | $\text{CO}_{2(\text{aq})}$                 | $\text{MgSiO}_2(\text{OH})_{2(\text{aq})}$ |                                          |
